# Supplementary material for: LSD1 promotes prostate cancer cell proliferation by upregulating PRAC1 expression
Source: Research Square preprint supplement (doi:10.21203/rs.3.rs-7401472/v1), 2025-09-08

Yang Liao<sup>1</sup>, Chuan Liu<sup>1\*</sup>

Western blot analysis of LDS1 and GAPDH protein levels. The top panel shows LDS1 protein levels, with bands at approximately 110 kDa for siCon, siLDS1-1, and siLDS1-2. The bottom panel shows GAPDH protein levels, with bands at approximately 37 kDa for siCon, siLDS1-1, and siLDS1-2. Molecular weight markers are indicated on the left of each panel.

| Vector |          |          | pPRAC |          |          |       |
|--------|----------|----------|-------|----------|----------|-------|
| siCon  | siLDS1-1 | siLDS1-2 | siCon | siLDS1-1 | siLDS1-2 |       |
|        |          |          |       |          |          | LDS1  |
|        |          |          |       |          |          | GAPDH |

Full length western blot image for Fig. S2B

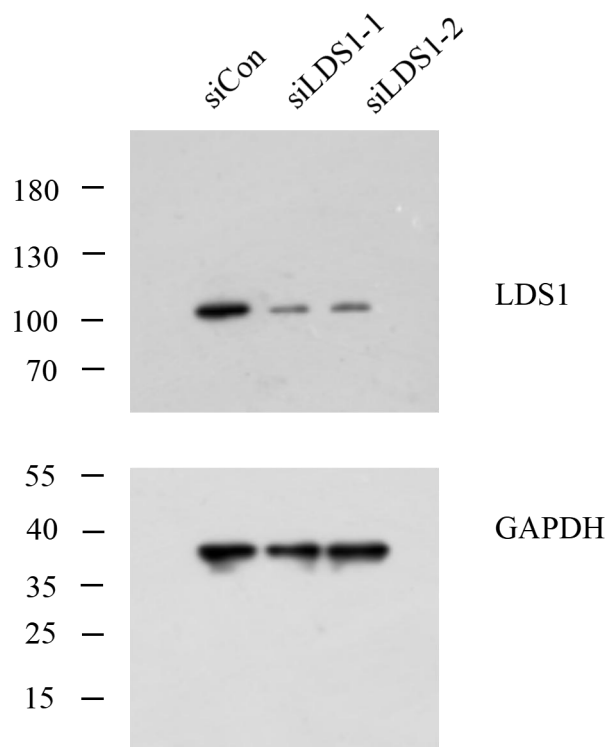

Supplement: Supplementary file 1 [file b8d54b989bd115bf22a381f6.pdf]
