# Supplementary material for: LSD1 promotes prostate cancer cell proliferation by upregulating PRAC1 expression
Source: Research Square preprint supplement (doi:10.21203/rs.3.rs-7401472/v1), 2025-09-08
Supplement: Supplementary file 2 [file fb7e4a83a38bc303aca11902.pdf]

## LSD1 promotes prostate cancer cell proliferation by upregulating *PRAC1*

Yang Liao<sup>1</sup>, Chuan Liu<sup>1\*</sup>

Fig S1

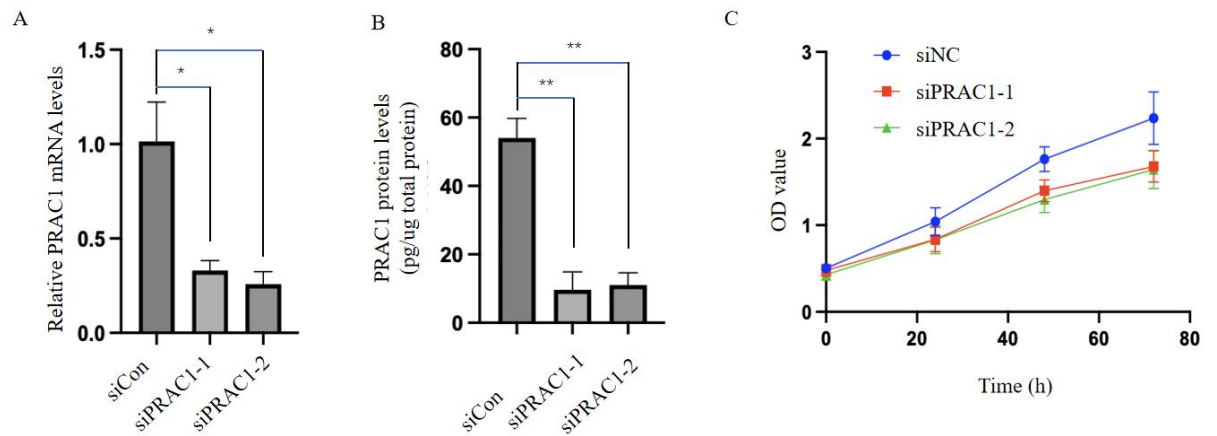

**Fig. S1 PRAC1 knockdown inhibits prostate cancer cell proliferation.**

DU145 cells were transfected with control or PRAC1 siRNAs, the mRNA (A) and protein (B) levels of PRAC1 were determined using reverse transcription quantitative PCR (RT-qPCR) and enzyme-linked immunosorbent assays (ELISA), respectively, at 48 h after transfection. (C) Cell proliferation assays were performed at different time points after transfection. Statistical analysis was performed using two-sided Student's *t*-tests; \* $p < 0.05$ , \*\*  $p < 0.001$ .

Fig S2

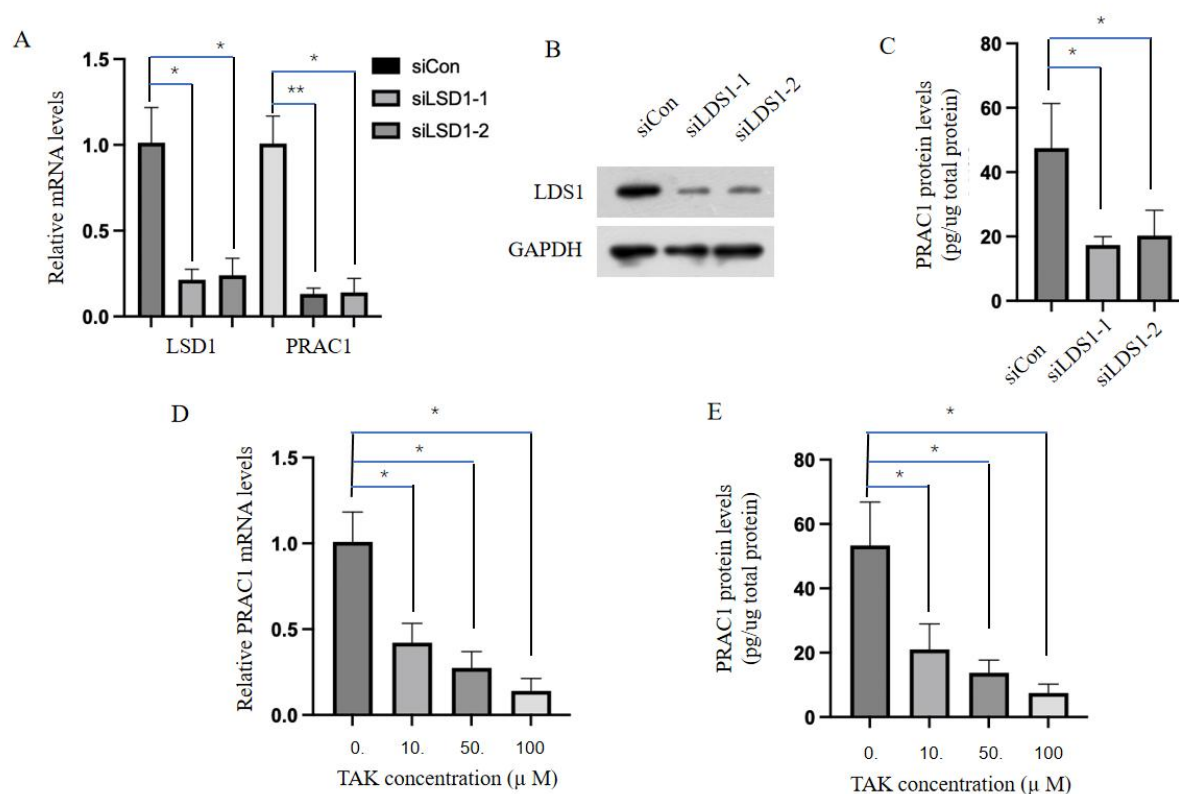

**Fig. S2 LSD1 promotes PRAC1 expression in prostate cancer cells.**

(A-C) DU145 cells were transfected with control or LSD1 siRNAs, (A) LSD1 and PRAC1 mRNA levels were determined using RT-qPCR 48 h after transfection, (B) LSD1 protein levels were determined using western blotting 48 h after transfection, (C) PRAC1 protein levels were determined using ELISA 48 h after transfection. (D,E) PRAC1 mRNA (D) and protein (E) levels in DU145 cells were determined using reverse transcription quantitative PCR and ELISA, respectively, at 72 h after treatment with different doses of TAK418.
